# Supplementary material for: Systematic Analysis of DNA Demethylase Gene Families in Foxtail Millet (Setaria italica L.) and Their Expression Variations after Abiotic Stresses
Source: MDPI journal article supplement (doi:10.3390/ijms25084464), 2024-04-18
Supplement: s1 [file s1]

## Supplementary Materials

**Table. S1 Primers used for RT-qPCR analysis in this study**

| Gene           | Specific Primer                                                         |
|----------------|-------------------------------------------------------------------------|
| <i>SiDML5</i>  | F:5'- GGATGAGTGGGAACCCATAAA - 3'<br>R:5'- GCTGAAGGGCAAAGGTTATTG -3'     |
| <i>SiDML4</i>  | F:5'- AGGCTATGGGTTGGGTCCT -3'<br>R:5'- CCTTCTCCCTGGTACATGTTG -3'        |
| <i>SiDML3a</i> | F:5'- AGCCATTAATGATGCCTCCCA -3'<br>R:5'- GCAATCGGTGCGTGTAGTA -3'        |
| <i>SiDML3b</i> | F:5'- CAGACCGGGTACTAAACAGATG -3'<br>R:5'- GGAGTTTCTGGTTCCTGGATAA -3'    |
| <i>SiROS1a</i> | F:5'- ATCTTTCCAGCTCTGCCTTTAT -3'<br>R:5'- CTCGAGCAGCAACCATTATCT -3'     |
| <i>SiROS1b</i> | F:5'- TTGTCTGTGTGCGAGGATTT -3'<br>R:5'- TGCTGTCTTGCGGGATTT -3'          |
| <i>SiROS1d</i> | F:5'- CATCGATCCAGTCACCACTATG -3'<br>R:5'- CTTCGTCAAGCCATTTCTCTTTATC -3' |
| <i>Actin</i>   | F:5'- CGCATATGTGGCTCTTGACT-3'<br>R:5'- GGGCACCTAAATCTCTCTGC-3'          |

Gene-specific primers for real-time reverse transcription quantitative PCR (RT-qPCR)

were designed by the Primer Quest tool

(<http://www.idtdna.com/Primerquest/Home/Index>). F, forward; R, reverse.

**Table. S2 Information of DNA demethylase genes in the 3 tested species**

| Latin name of specie        | Gene name      | Gene ID                 |
|-----------------------------|----------------|-------------------------|
| <i>Arabidopsis thaliana</i> | <i>AtDML5a</i> | <i>AT2G31450.1</i>      |
|                             | <i>AtDML5b</i> | <i>AT1G05900.1</i>      |
|                             | <i>AtDML4</i>  | <i>AT3G47830.1</i>      |
|                             | <i>AtDML3</i>  | <i>AT4G34060.3</i>      |
|                             | <i>AtDML2</i>  | <i>AT3G10010.1</i>      |
|                             | <i>AtDME</i>   | <i>AT5G04560.1</i>      |
|                             | <i>AtROS1</i>  | <i>AT2G36490.1</i>      |
| <i>Oryza sativa</i>         | <i>OsDML5</i>  | <i>LOC_Os11g16580.1</i> |
|                             | <i>OsDML4</i>  | <i>LOC_Os06g13070.1</i> |

|                          |                     |                             |
|--------------------------|---------------------|-----------------------------|
|                          | <i>OsDML3a</i>      | <i>LOC_Os02g29380.1</i>     |
|                          | <i>OsDML3b</i>      | <i>LOC_Os04g28860.1</i>     |
|                          | <i>OsROS1a</i>      | <i>LOC_Os01g11900.1</i>     |
|                          | <i>OsROS1b</i>      | <i>LOC_Os05g37350.1</i>     |
|                          | <i>OsROS1c</i>      | <i>LOC_Os05g37410.1</i>     |
|                          | <i>OsROS1d</i>      | <i>LOC_Os02g29230.1</i>     |
| <i>Triticum aestivum</i> | <i>TaROS1b-1A.1</i> | <i>TraesCS1A02G278000.1</i> |
|                          | <i>TaROS1b-1B.1</i> | <i>TraesCS1B02G286900.2</i> |
|                          | <i>TaROS1b-1D.1</i> | <i>TraesCS1D02G277100.1</i> |
|                          | <i>TaROS1b-1A.2</i> | <i>TraesCS1A02G349600.1</i> |
|                          | <i>TaROS1b-1B.2</i> | <i>TraesCS1B02G364100.2</i> |
|                          | <i>TaROS1b-1D.2</i> | <i>TraesCS1D02G352500.2</i> |
|                          | <i>TaDML3a-3A</i>   | <i>TraesCS3A02G022500.1</i> |
|                          | <i>TaDML3a-3B</i>   | <i>TraesCS3B02G023200.1</i> |
|                          | <i>TaDML3a-3D</i>   | <i>TraesCS3D02G024100.1</i> |
|                          | <i>TaDML5-4A</i>    | <i>TraesCS4A02G232700.2</i> |
|                          | <i>TaDML5-4B</i>    | <i>TraesCS4B02G083100.1</i> |
|                          | <i>TaDML5-4D</i>    | <i>TraesCS4D02G081200.1</i> |
|                          | <i>TaROS1a-5A</i>   | <i>TraesCS5A02G169000.1</i> |
|                          | <i>TaROS1a-5B</i>   | <i>TraesCS5B02G165800.2</i> |
|                          | <i>TaROS1a-5D</i>   | <i>TraesCS5D02G173300.2</i> |
|                          | <i>TaDML4-7A</i>    | <i>TraesCS7A02G194800.1</i> |
|                          | <i>TaDML4-7B</i>    | <i>TraesCS7B02G100500.1</i> |
|                          | <i>TaDML4-7D</i>    | <i>TraesCS7D02G196400.1</i> |
